# Supplementary material for: Intake of Hydrolyzed Casein is Associated with Reduced Body Fat Accretion and Enhanced Phase II Metabolism in Obesity Prone C57BL/6J Mice
Source: PLoS One. 2015 Mar 4;10(3):e0118895. doi: 10.1371/journal.pone.0118895 (PMC4349863; doi:10.1371/journal.pone.0118895)
Supplement: S2 Table — (XLSX) [file pone.0118895.s003.xlsx]

## Sheet: Supplemental Table 1
	Abbreviation	Gene name	5'prime	3'prime
	Abcc3	ATP-binding casette, sub-family c, member 3	ATACTCGGAGGAGGACATCT	TCTGGCCAACACTGAGATTA
	Gss	Glutathione synthetase	GCGTGTTGCTGAGGTCCGCA	GGGCATACGTCACCACGTCGG
	Gpx1	Glutathione peroxidase 1	TTCCCGTGCAATCAGTTC	GCCTTCTCACCATTCACTTC
	Me	Malic enzyme	GGAGCTCCAGGTCCTTAGAA	TGAGCACGCTGTAGAAGAGC
	Mdm2	Transformed mouse 3T3 cell double minute 2 (p53-binding protein Mdm2)	CTCTCGGATCACCGCGC	ATGGTTTTGTGCTAACCAGAG
	Sult1a1	Sulfotransferase Family, Cytosolic, 1A, Phenol-Preferring, Member 1	GAAAGTGTCCTATGGGTCGT	CTCCCTTTTGGGATTCTCCT
	Tbp	TATA-Box Binding Protein	ACCCTTCACCAATGACTCCTATG	ATGATGACTGCAGCAAATCGC
	Tigar	TP53-induced glycolysis and apoptosis regulator	CCGCCTGGTGAAACAAGAC	AAAATGCCATGTATGGTCTGC
	Ugt1a5	UDP glucuronosyltransferase 1 family, polypeptide A5	GTGGAGCTTTTCAGCTATGC	GCTTCAAATTCCTGAGAGAGG
	Ugt1a6b	UDP glucuronosyltransferase 1 family, polypeptide A6B	TCGAATATCCCAGGCCAATC	TCAAATTCCTGAGTCAGCTTTC
	Ugt2b34	UDP glucuronosyltransferase 2 family, polypeptide B34	TCATGGAGAGGGTGAGAAATG	TGTCGTGGGTCTTCCTAATAC
